# Supplementary material
Source: MDPI journal article supplement (https://www.mdpi.com/2077-1312/12/3/517)

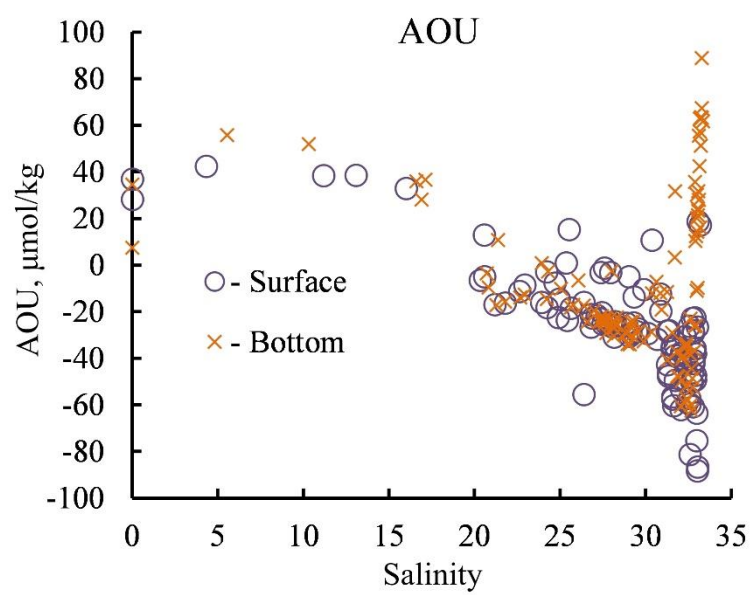

**Figure S1.** Dependence of the AOU on salinity.

Supplement: s1 [file s1]
